# Phylogenomic Resolution of the Cetacean Tree of Life Using Target Sequence Capture

MICHAEL R. McGOVERN<sup>1,2</sup>, GEORGIA TSAGKOGEOURGA<sup>1</sup>, SANDRA LIVARELLI-CARRETERO<sup>1</sup>, MARIO DOS REIS<sup>1</sup>, MONIKA STRUEBIG<sup>1</sup>, ROBERT DEAVILLE<sup>3</sup>, PAUL D. JEPSON<sup>3</sup>, SIMON JARMAN<sup>4</sup>, ANDREA POLANSKI<sup>5</sup>, PHILLIP A. MORIN<sup>6</sup>, AND STEPHEN J. ROSSITER<sup>1,\*</sup>

<sup>1</sup>School of Biological and Chemical Science, Queen Mary University of London, Mile End Road, London E1 4NS, UK; <sup>2</sup>Department of Vertebrate Zoology, Smithsonian Museum of Natural History, 10th & Constitution Ave. NW, Washington DC 20560, USA; <sup>3</sup>Institute of Zoology, Zoological Society of London, Oxford Centre, London NW1 4RY, UK; <sup>4</sup>School of Biological Science, University of Western Australia, 35 Stirling Highway, Perth WA 6009, Australia; <sup>5</sup>Algalian Antarctic Division, 203 Channel Highway, Kingston TAS 7050, Australia; and <sup>6</sup>South Florida Science Center, National Marine Fisheries Service, NOAA, 8901 La Jolla Village Drive, La Jolla CA 92037 USA

\*Correspondence to: School of Biological and Chemical Science, Queen Mary University of London, Mile End Road, London E1 4NS, UK; E-mail: s.j.rossiter@qmul.ac.uk

Received 15 November 2018; accepted 2 October 2019; accepted 6 October 2019  
Associate Editor: Heenam Lee-Feinberg

**Abstract.** Targeted sequence capture (TSC) has been used to generate large-scale genomic data for non-model organisms, but its application to phylogenomics has been limited. We used TSC to generate a large-scale genomic dataset for cetaceans, focusing on the mitochondrial and nuclear genomes. We used a combination of TSC and whole-genome sequencing (WGS) to generate a high-quality reference genome for the bottlenose dolphin (*Tursiops truncatus*). We used this reference genome to guide the TSC of other cetacean species, resulting in a large-scale genomic dataset for 11 species. We used this dataset to resolve the cetacean tree of life, showing that TSC is a powerful tool for phylogenomics. We found that TSC is more effective than WGS for generating large-scale genomic data for non-model organisms, and that it can be used to resolve the tree of life for a wide range of species. We also found that TSC is more cost-effective than WGS, and that it can be used to generate high-quality reference genomes for non-model organisms.

Cetaceans are a highly diverse group of mammals, with over 100 species. They are found in all oceans and are important for marine ecosystems. However, the phylogenetic relationships between cetacean species have been difficult to resolve using traditional morphological and molecular data. This is because cetaceans have a complex evolutionary history, with many species having diverged relatively recently. In this study, we used target sequence capture (TSC) to generate a large-scale genomic dataset for cetaceans, focusing on the mitochondrial and nuclear genomes. We used a combination of TSC and whole-genome sequencing (WGS) to generate a high-quality reference genome for the bottlenose dolphin (*Tursiops truncatus*). We used this reference genome to guide the TSC of other cetacean species, resulting in a large-scale genomic dataset for 11 species. We used this dataset to resolve the cetacean tree of life, showing that TSC is a powerful tool for phylogenomics. We found that TSC is more effective than WGS for generating large-scale genomic data for non-model organisms, and that it can be used to resolve the tree of life for a wide range of species. We also found that TSC is more cost-effective than WGS, and that it can be used to generate high-quality reference genomes for non-model organisms.



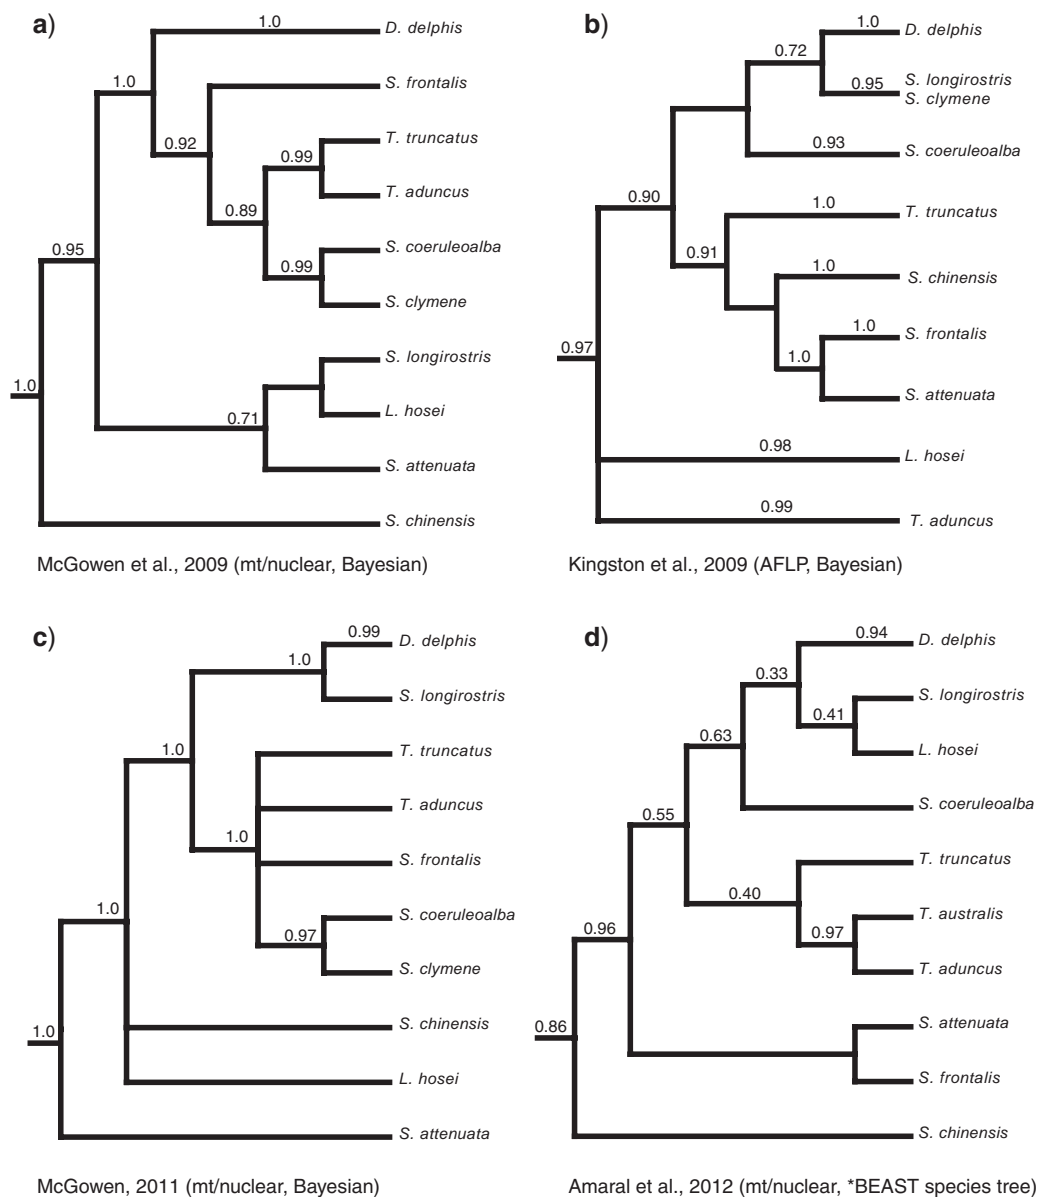

FIGURE 1. Phylogenetic relationships among cetacean species based on mitochondrial and nuclear DNA sequences. The trees show the relationships among *D. delphis*, *S. frontalis*, *T. truncatus*, *T. aduncus*, *S. coeruleoalba*, *S. clymene*, *S. longirostris*, *L. hosei*, *S. attenuata*, and *S. chinensis*. The trees are rooted at the bottom and show the posterior probability values at the nodes.

Phylogenetic relationships among cetacean species based on mitochondrial and nuclear DNA sequences. The trees show the relationships among *D. delphis*, *S. frontalis*, *T. truncatus*, *T. aduncus*, *S. coeruleoalba*, *S. clymene*, *S. longirostris*, *L. hosei*, *S. attenuata*, and *S. chinensis*. The trees are rooted at the bottom and show the posterior probability values at the nodes.

Phylogenetic relationships among cetacean species based on mitochondrial and nuclear DNA sequences. The trees show the relationships among *D. delphis*, *S. frontalis*, *T. truncatus*, *T. aduncus*, *S. coeruleoalba*, *S. clymene*, *S. longirostris*, *L. hosei*, *S. attenuata*, and *S. chinensis*. The trees are rooted at the bottom and show the posterior probability values at the nodes.

Phylogenetic relationships among cetacean species based on mitochondrial and nuclear DNA sequences. The trees show the relationships among *D. delphis*, *S. frontalis*, *T. truncatus*, *T. aduncus*, *S. coeruleoalba*, *S. clymene*, *S. longirostris*, *L. hosei*, *S. attenuata*, and *S. chinensis*. The trees are rooted at the bottom and show the posterior probability values at the nodes.

Phylogenetic relationships among cetacean species based on mitochondrial and nuclear DNA sequences. The trees show the relationships among *D. delphis*, *S. frontalis*, *T. truncatus*, *T. aduncus*, *S. coeruleoalba*, *S. clymene*, *S. longirostris*, *L. hosei*, *S. attenuata*, and *S. chinensis*. The trees are rooted at the bottom and show the posterior probability values at the nodes.

BLAST RNA (M) 100 (A) A  
MI, USA; A B) 10,271  
CDS B  
M  
(T. nca Z T. 1.4  
) fi 4  
(Moplon  
biden, Lagenodelphi ho ei, Cape ea ma gina a, Senella  
coe leoalba), (Choe op i  
libe ien i),  
A fi  
3256  
DNA  
77 68  
(A T A1).

#### Target Sequence Capture and Sequencing

T M B M 3.0  
RNA ~20 24 C  
DNA S C1  
(M O )  
T DNA fi  
E L G C Q  
M U L I N S  
500 150 A  
S R A (SRA) NCBI, B P  
PRJNA575269.

#### Assembly of Read and Identification of Contig

0.11.5 (B B) F QC  
T 0.36 (B . 2014). A  
S<sub>1</sub> T S<sub>1</sub> D  
//10.5061/ 40 0 T  
2.2.0  
(G . 2011). T  
E- 10<sup>-6</sup>  
FASTA fi  
O. o ca T. nca

P S<sub>1</sub> T S<sub>1</sub>  
D I FASTA fi CDS  
Balaenop e a ac o o a a,  
B. ph al, Megap e a na aeangliae, Balaena m ice,  
Ph e e mac ocephal, Neophocaena phocaenoide, Lipo e  
e illife ( . 2013; . 2013; K .  
2015; T . 2015; . 2017),  
B o a, O i a ie,  
Pan halop hodg onii, S c ofa, Vic gna paco, Camel  
bac ian, Eq caball (L . 2011;  
B C . 2012; G . 2012; G .  
2013; J . 2014). A  
(38,832)

#### Alignment

E 7 (K S . 2013)  
38,832 T fi  
A  
O. o ca T. nca  
Y 65  
(665)  
fi fi 3191  
NCBI  
G B Pla ani a gange ica (S A)  
Balaenop e a om ai ( )  
72 P. gange ica (57,770)  
67 B. om ai (57,686). S<sub>1</sub> T S<sub>2</sub>  
D

#### Phylogenomic Analysis

3191 (38,167) 6,527,596  
D A D B D A  
P. gange ica B. om ai  
D B F

RA ML 8.2 (S [2014](#)): (i)  
 (ii) 3191 1573  
 P H 2.1.1 (L [2016](#)).  
 GTRCAT  
 RA ML  
 T fi fi 1000  
 B D A GTR+G  
 E B (A [2014](#)). T  
 D A 1,000,000  
 500 T  
 25% R  
 B T 12  
 (R [2018](#))  
 RA ML E B  
 CIPRES S G 3.3 (M [2010](#)).  
 RA ML  
 D 8.2 3191 GTRCAT  
 P. gange ica B. om ai, ASTRAL-III  
 5.6.1 (M [2015](#); [2018](#)).  
 3191 RA ML

#### Diversity Data Analysis

F  
 3096. I  
 Delphin  
 delphi delphi  
 bai dii (108471). I  
 >50%  
 (i.e., Haploodon planifrons, Phocoenoides dalli, Bealid  
 anii, P. gange ica, B. om ai). O  
 (OTU)  
 E B  
 fi 85

fi  
 R [2012](#)  
 PAML 4.9 [2007](#)  
 HK 85  
 (H [1985](#)). P  
 O.  
 o ca ( ) B. ac o o a a ( )  
 B.  
 ac o o a a  
 U 3 10 1032 309  
 T  
 (1/2 3 CP)  
 3-  
 6-  
 10-  
 D MCMCT 4.9 PAML  
 ( [2007](#)). MCMCT  
 B (R [2011](#); R [2012](#)). M  
 ( [2011](#))  
 3 R (R [2018](#)).  
 T (PP)  
 (AR IR)  
 T (R [2018](#))  
 T  
 B  
 1  
 20,  
 40, 85 5  
 20 20 20 40 A R [2018](#),  
 85 fl  
 N  
 T

TABLE 1.

---







A  
C (C + H)  
R<sub>1</sub> (C + H)  
H<sub>1</sub> (C + H)  
S<sub>1</sub> (C + H)  
D<sub>1</sub> (C + H)  
M<sub>1</sub> (C + H)  
2011),  
B<sub>1</sub> (C + H)  
S<sub>1</sub> (C + H)  
Sagma ia (en L<sub>1</sub> 1999; V<sub>1</sub> 2019),  
Cephalo h nch S enella. D<sub>1</sub> A<sub>1</sub>  
P. gange ica, S<sub>1</sub> A<sub>1</sub>  
Pon opo ia)  
+ D<sub>1</sub>

Dü e gence Da ing  
T<sub>1</sub> 1  
-fi  
F<sub>1</sub>  
A<sub>1</sub>  
MCMCT  
ESS  
(S<sub>1</sub> H<sub>1</sub> S4 S9)  
C<sub>1</sub> H<sub>1</sub> 3  
AR<sub>1</sub> IR<sub>1</sub>  
F<sub>1</sub>  
3-  
S<sub>1</sub> H<sub>1</sub> S10  
D<sub>1</sub> AR<sub>1</sub> IR<sub>1</sub>  
P<sub>1</sub> 95% CI)  
IR<sub>1</sub>  
3- 6- 10-  
D<sub>1</sub> S<sub>1</sub> H<sub>1</sub> S12  
D<sub>1</sub> (AR<sub>1</sub> IR<sub>1</sub>)  
D<sub>1</sub> F<sub>1</sub>  
M<sub>1</sub> 1.25  
(S<sub>1</sub> T<sub>1</sub> S3)  
D<sub>1</sub>  
10/  
S14, T<sub>1</sub> S3  
S<sub>1</sub> H<sub>1</sub> S15, T<sub>1</sub> S3  
F<sub>1</sub> 10 S<sub>1</sub> D<sub>1</sub>  
AR<sub>1</sub> (H<sub>1</sub> 5)  
fi 0.192,

1 M<sub>1</sub> 0.192 M<sub>1</sub>  
95% CI.  
(H<sub>1</sub> 5)  
0.173, 0.115, 0.074  
(H<sub>1</sub> 5)  
T<sub>1</sub> 6 10  
(H<sub>1</sub> 5),  
IR<sub>1</sub> (S<sub>1</sub> H<sub>1</sub> S15)  
D<sub>1</sub>  
T<sub>1</sub>  
(R<sub>1</sub> O<sub>1</sub> C<sub>1</sub> (6-  
AR<sub>1</sub> IR<sub>1</sub>  
8.29 M<sub>1</sub> B<sub>1</sub>  
14.47 M<sub>1</sub> (H<sub>1</sub> 3; S<sub>1</sub> T<sub>1</sub> S3)  
D<sub>1</sub> C<sub>1</sub> AR<sub>1</sub> 1.08  
M<sub>1</sub> IR<sub>1</sub>  
Kogia<sub>1</sub> >0.61 (H<sub>1</sub> 3; S<sub>1</sub> T<sub>1</sub> S3)  
D<sub>1</sub> A<sub>1</sub> C<sub>1</sub>  
3 M<sub>1</sub> AR<sub>1</sub>  
IR<sub>1</sub> C<sub>1</sub> B<sub>1</sub> (10.61  
M<sub>1</sub> 4.79 M<sub>1</sub>), D<sub>1</sub> (19.78 M<sub>1</sub> 16.44 M<sub>1</sub>),  
B<sub>1</sub> (15.74 M<sub>1</sub> 10.99 M<sub>1</sub>). N<sub>1</sub>  
3.07 M<sub>1</sub> R<sub>1</sub> (S<sub>1</sub> T<sub>1</sub> S3)  
U<sub>1</sub> 6- AR<sub>1</sub>  
(O=53.92 M<sub>1</sub>),  
Himala ace ba h én i (B<sub>1</sub> 1998;  
S<sub>1</sub> T<sub>1</sub> S3)  
C<sub>1</sub> C<sub>1</sub> (O=36.72 M<sub>1</sub>),  
M<sub>1</sub> acodon élenen i L<sub>1</sub>  
E<sub>1</sub> P<sub>1</sub> (L<sub>1</sub> 2017). T<sub>1</sub> fi  
C<sub>1</sub> O<sub>1</sub>  
E<sub>1</sub> (O=34.13 M<sub>1</sub>),  
M<sub>1</sub> (O=25.73 M<sub>1</sub>)  
fi<sub>1</sub> 8  
M<sub>1</sub> B<sub>1</sub> M<sub>1</sub>  
+ P<sub>1</sub> D<sub>1</sub> M<sub>1</sub> fi  
Me oplodon  
L<sub>1</sub> M<sub>1</sub>

DISCUSSION  
T<sub>1</sub> fi  
U<sub>1</sub>







T. A. (L. . 2019). B E. ob C fl N. 6 B. om ai, B. m c l + Balaenop e a edeni + B. bo eali 100% BS RA ML D B (S H). S1 D).

[illegible]

B. (S. A.) (I. G. (G. J. . 2011; M. . 2016). A. Pla ani a 72 P. gange ica (H. . 2), (Inia, Lipo e , Pon opo ia). S. Pla ani a (C. . 2000; H. . 2012), fi (M G. . 2009; S. . 2009; C. . 2011; G. J. . 2011; M. . 2011; N. . 2001; . 2011). P.

- (*Me oplodon ho a la*, *Inia*, *Me oplodon a e ii*, *Indopace pacific*; Hf. 2). T. (G. 2011). D. (M. + P. + D. ) (M. + P. + M. ) (P. ) (A. ) (M. -C. ) 2008; D. ) 2008, 2014; M. G. ) 2009; S. ) 2009). M. ) (G=15.61 M ; 95% CI: 13.65 17.79; Hf. 3), *Be a di* *Ta mace*, *Ziphi*, *H pe oodon*, *Me oplodon* (Hf. 2). O. *Ta mace hephe di*, (E. ) (M. ) 2017). fi (Be a di, Ziphi, Ta mace) H (Indopace, H pe oodon, Me oplodon), H pe oodon + Me oplodon 15 Me oplodon (L. M. ) 13 5 M (Hf. 3). Me oplodon, fi biden, gingkoden, e opae, ca lh bb i, bo doini; hec o i, g a i, ejnege i, den i o i, pe ini, pe ian. A. la a dii hec o i DNA, (D. ) 2002, 2007, 2008, 2014; M. G. ) 2009; S. ) 2009). fi gingkoden + mi + e opae DNA, biden (Hf. 2). T. fi biden M. Me oplodon (D. ) 2008, 2014; M. G. ) 2009; S. ) 2009). P. (Inia, Pon opo ia, Lipo e). I. Lipo e D. (D. + I. ) + P. + U. ) (C. ) 2000; H. ) 2001). Inia + Pon opo ia (A. ) (M. -C. ) 2008; M. G. ) 2009; S. ) 2009; G. ) 2011; H. ) 2012). I. fi (Hf. 2), O. (G=23.97 M ; 95% CI: 23.03 24.92). E. Lipo e *Neophocoena* *Phocoena*. T. *Phocoena* *Phocoena phocoena* *P. dalli* *Phocoena*; (P. ) 2001; M. G. ) 2009; S. ) 2009). O. D. (Hf. 2). T. C. D. (G=12.72 M ) 3 M AR IR. (G=9.86 M ) (M. G. ) 2009; S. ) 2009; S. ) 2010; H. ) 2012). M. L. M. /P. (Hf. 3). R. D. fi (M. G. ) 2009; S. ) 2009; M. G. ) 2011). fi D. (Le cople ac, O. o ca, *Lageno h nch albi o i*; Hf. 2), O. o ca ac *L. albi o i* (M. G. ) 2011). N. L. ac *L. albi o i* *Lageno h nch*, *Sagma ia* (en L. ) 1999; V. ) 2019; Hf. 2). E. fi G. (fi G. amp, O caella, S eno), D. So a So alia).

- R (Liodelphi, Sagmaia, Cephalo h nch) (M G 2009; M G 2011).
- (Sagmaia c cige, Cephalo h nch e opia, C. hec o i); C. e opia C. hec o i Cephalo h nch comme oni, S. c cige S. a ali (P 2001; H 2006; M -C 2006; M G 2009; S 2009; M G 2011; B 2014; V 2019). B
- Cephalo h nch Sagmaia Cephalo h nch hea i idii Cephalo h nch (M -C 2006; M G 2011), S. a ali (S. c cige) Cephalo h nch
- fi O caella, S eno, G anip G O caella S eno L M (H. 3). P
- fi (Globicephala, Fe e a, P e do ca, Peponocephala; S 2008; M G 2008, 2009; S 2009; B 2014). I
- O caella fi O cin O cin DNA (L 1999), O cin O caella (L 1999; A 2008). A S eno So alia (C 2011; V 2011).
- T fi D (T iop, S enella, So a, So alia, Lagenodelphi, Delphin), (H. 1; P 2013; B 2018). I fi S enella, T iop, Delphin, Lagenodelphi (H. 2), DNA, DNA (H. 1; L 1999; C 2008; K 2009; M G 2009; S 2009; M G 2011; A 2012). H So alia So a
- O Lagenodelphi, S. coe leoalba, S. longi o i, S enella cl mene. T (S. a en a a + S. f on ali) (T. nca T. ad nc), T. A (2012) 13 DNA (H. 1), (H. 2), T. (P 1981). P (1987)
- M Lagenodelphi, S enella, T iop, So a Delphin (L 1999; C 2008; M G 2009; M G 2011; P 2013); (L. ho ei, S. coe leoalba, S. cl mene, S. longi o i) Delphin S enella (S. a en a ali) S enella P (1987) T iop
- R Delphin capen i, (N 2006; K 2009; C 2015; F -C 2017), M M C T D. delphi (S J M M C T 2017). T bai dii opicali, capen i, (H P 1994; J V 2002). I C (2015), fi D. capen i D. delphi, fi I O opicali V 2002) D. capen i D. delphi delphi UK C (D. delphi bai dii; 79929, 108471; H. 2).



O. *fi* *cl* *ene*. *S. enella cl mene*.  
*H. S. cl mene* *S. longi o* *i* *ene*.  
*(H. 2). S. enella cl mene* *P. (1981)*, *S. longi o* *i* *ene*.  
*S. coe leoalba* *M. S. cl mene* *S. coe leoalba*  
*(L. 1999)*, *DNA* *S. cl mene* *S. coe leoalba*  
*(L. 1999, M. C. A. 2006; M. G. 2009)*. *C. fi* *ene*,  
*DNA* *AFLP* *S. cl mene* *S. longi o* *i* *(K. 2009; H. 1). A. (2014)* *S. cl mene*  
*S. coe leoalba*, *S. longi o* *i*; *DNA*  
*fi* *ene*. *O. S. cl mene*, *S. cl mene*, *S. cl mene*.

#### CONCLUSION

3191 *68* *18* *(38,167* *>6.5* *(77* *89* *). E* *D* *(* *O* *S. enella*, *Lagenodelphi*, *Delphin*, *T. iop*. *F. 12* *ali len i*), *(So alia fl ia ili, So apl mbea, S. ali len i)*, *(Me oplodon a e ii, M. ho a la)*. *C* *S. cl mene* *S. coe leoalba* *S. longi o* *i* *ene*.

#### SUPPLEMENTAR MATERIAL

*D* *D* *R* *://* */10.5061/* *40 0*

#### ACKNO LEDGMENTS

*P. A. D* *J. E (M* *A. B* *A. L* *J. P (QMUL)* *M. M (CIPRES)* *M. B* *Hippopo am amphibi* *C* *T* *A* *A* *S* *L* *A* *K. R* *(S* *H* *S* *C* *S FSCI)* *L. B* *J. B* *K. F (S FSC)* *T. J (C* *E* *P. B (S* *A* *M* *C. S. B (O* *S* *U* *R. S* *L. Q* *A* *D* *H* *G* *E* *O* *(NMFS, P* *fi* *H* *S* *C* *K. (U* *H* *M. P. H* *J* *(G* *I* *N* *R* *D. K* *(* *K* *RASI)* *S. FSC* *T* *L* *N* *C* *T* *A* *C. S. B* *M. L. D* *C* *U* *A* *(R* *Me oplodon gingkoden* *D. S (O* *S* *U* *T* *K* *C* *R* *A* *(P* *M* *T* *M* *C* *P* *T* *D* *Z* *P* *I* *P* *E* *(DPIP* *El)* *C. B* *J* *G* *J*.

#### FUNDING

*T* *R* *S* *N* *I* *F* *M.R.M.* *S.J.R.* *E* *R* *C* *S* *(310482,* *EVOGENO)* *S.J.R.*

#### AUTHOR S CONTRIBUTIONS

*M.R.M.* *S.J.R.* *R.D.* *P.D.J.*, *S.J.*, *A.P.*, *P.A.M.* *M.R.M.* *M* *(* *A* *B* *M.R.M.* *M.S.* *M.R.M.* *G.T.* *M.R.M.* *S.A.-C.*, *M.*, *R.* *M.R.M.* *S.J.R.*



## APPENDI

| TABLE A1.              | UJ   | UJ         | UJ | UJ    | UJ     | UJ        | UJ |
|------------------------|------|------------|----|-------|--------|-----------|----|
| S                      | J J  | C          | ID | L     | L      | I         | O  |
| C                      |      |            |    |       |        |           |    |
| <i>Balaenop e a</i>    | A    | 199219648  | T  | AAD   |        |           |    |
| <i>bonae en i</i>      | S    | S 2012/413 | N  | IO    |        |           |    |
| <i>Balaenop e a</i>    | B    | 1380856971 | T  | AAD   |        |           |    |
| <i>(edeni) edeni</i>   | B    | 66737      | O  | S FSC |        |           |    |
| <i>Balaenop e a</i>    | B    | 49099      | C  | S FSC |        |           |    |
| <i>(edeni) edeni</i>   | B    | S 1995-105 | K  | IO    |        |           |    |
| <i>Balaenop e a</i>    | H    | 9128       | N  | S FSC | N C TA | BAR02     |    |
| <i>m c l</i>           | B    | 76728      | C  | S FSC |        |           |    |
| <i>Balaenop e a</i>    | P    | 5990       | N  | S FSC |        |           |    |
| <i>ph al</i>           | C    | 40         | C  | S FSC |        |           |    |
| <i>Be a di a n ii</i>  | H    | 7320       | S  | S FSC | PBB    | 9622      |    |
| <i>Be a di bai dii</i> | B    | 55860      | A  | S FSC | ADFG   | BB2006-44 |    |
| <i>Cape ea</i>         | N. P | 79929      | C  | S FSC |        |           |    |
| <i>ma gina a</i>       | N. P | 108471     | C  | S FSC |        |           |    |
| <i>Cephalo h nch</i>   | S    | S 1999-92  | D  | IO    |        |           |    |
| <i>comme onii</i>      | I    | 4525       | I  | S FSC |        |           |    |
| <i>Cephalo h nch</i>   | G    | 133943     | C  | S FSC |        |           |    |
| <i>hea i idii</i>      | S    | TAS1201    | T  | AAD   |        |           |    |
| <i>Delphinap e</i>     | N    | 13086      | M  | S FSC |        |           |    |
| <i>le ca</i>           | N    | 43864      | A  | S FSC |        |           |    |
| <i>Delphin delphi</i>  | P    | 145402     | E  | S FSC |        |           |    |
| <i>bai dii</i>         | S    | 39091      | C  | S FSC |        |           |    |
| <i>Delphin delphi</i>  | L    | S 1997-162 | N  | IO    |        |           |    |
| <i>Delphin delphi</i>  | R    | S 1992-213 | D  | IO    |        |           |    |
| <i>opicali</i>         | S    | 9120       | N  | S FSC | N C TA | HPL01     |    |
| <i>E ch ich i</i>      | N    | S 2006-40  | L  | IO    |        |           |    |
| <i>ob</i>              | A    | 505        | A  | S FSC | USNM   | 571366    |    |
| <i>E balaena</i>       | D    | 12696      | F  | S FSC |        |           |    |
| <i>a ali</i>           | P    | S 1997-159 | P  | IO    |        |           |    |
| <i>E balaena</i>       |      |            |    |       |        |           |    |
| <i>glacials</i>        |      |            |    |       |        |           |    |
| <i>E balaena</i>       |      |            |    |       |        |           |    |
| <i>japonica</i>        |      |            |    |       |        |           |    |
| <i>Fe e a a en a a</i> |      |            |    |       |        |           |    |
| <i>Globicephala</i>    |      |            |    |       |        |           |    |
| <i>mac o h nch</i>     |      |            |    |       |        |           |    |
| <i>Globicephala</i>    |      |            |    |       |        |           |    |
| <i>mela</i>            |      |            |    |       |        |           |    |
| <i>G amp g i e</i>     |      |            |    |       |        |           |    |
| <i>H pe oodon</i>      |      |            |    |       |        |           |    |
| <i>planif on</i>       |      |            |    |       |        |           |    |
| <i>H pe oodon</i>      |      |            |    |       |        |           |    |
| <i>amp lla</i>         |      |            |    |       |        |           |    |
| <i>Inia geoff en i</i> |      |            |    |       |        |           |    |
| <i>Kogia ima</i>       |      |            |    |       |        |           |    |
| <i>Kogia b a icep</i>  |      |            |    |       |        |           |    |

TABLE A.1. C J t e

| S J J                                                           | C k k         | ID          | L J                    | L J J J | I J J J J | O J J ID |
|-----------------------------------------------------------------|---------------|-------------|------------------------|---------|-----------|----------|
| <i>Lagenodelphi</i><br><i>ho ei</i>                             | F J J J J     | 452         | N J P J fi             | S FSC   | USNM      | 500354   |
| <i>Lagenodelphi</i><br><i>ho ei</i>                             | F J J J J     | 30470       | H J J, USA             | S FSC   |           |          |
| <i>Lageno h nch</i><br>( <i>Sagma ia</i> )<br><i>a ali</i>      | P J J J       | 4926        | C E J J J S J C J      | S FSC   |           |          |
| <i>Lageno h nch</i><br>( <i>Sagma ia</i> )<br><i>obliq iden</i> | P J fi        | 31902       | C J J J, USA           | S FSC   |           |          |
| <i>Lageno h nch</i><br>( <i>Sagma ia</i> )<br><i>ob c</i>       | D J J J       | 2318        | P J J                  | S FSC   |           |          |
| <i>Lageno h nch</i><br>( <i>Le cople</i> )<br><i>ac</i>         | A J J J       | S 1998-90   | N J J J J J, E J J     | IO      |           |          |
| <i>Lageno h nch</i><br><i>albi o i</i>                          | J J J J       | S 1999-201A | H J J J J, E J J       | IO      |           |          |
| <i>Li odelphi</i><br><i>bo eali</i>                             | N J J J       | 113034      | C J J J, USA           | S FSC   |           |          |
| <i>Li odelphi</i><br><i>pe onii</i>                             | S J J J       | LPER020904  | T J J J, A J J J       | AAD     |           |          |
| <i>Me oplodon</i><br><i>biden</i>                               | S J J J       | S 1998-81   | L J J J J, E J J       | IO      |           |          |
| <i>Me oplodon</i><br><i>bo doini</i>                            | A J J J       | 9109        | N J J J                | S FSC   | N C TA    | CA01     |
| <i>Me oplodon</i><br><i>ca lh bb i</i>                          | H J J J       | 1563        | C J J J, USA           | S FSC   |           |          |
| <i>Me oplodon</i><br><i>den i o i</i>                           | B J J J       | S 1993-78   | D J J J                | IO      |           |          |
| <i>Me oplodon</i><br><i>e opae</i>                              | G J J J       | 7444        | F J J J, USA           | S FSC   |           |          |
| <i>Me oplodon</i><br><i>ginkgoden</i>                           | G J J J       | M J J N 03  | T J J J, N J J         | N C TA  |           |          |
| <i>Me oplodon g a i</i>                                         | G J J J       | 210210      | T J J J, A J J J       | AAD     |           |          |
| <i>Me oplodon</i><br><i>hec o i</i>                             | H J J J       | 9115        | N J J J                | S FSC   |           |          |
| <i>Me oplodon</i><br><i>la a dii</i>                            | S J J J       | 1763273011  | T J J J, A J J J       | AAD     |           |          |
| <i>Me oplodon mi</i>                                            | T J J J       | 4972        | N J J J, USA           | S FSC   | USNM      | 504612   |
| <i>Me oplodon</i><br><i>pe ini</i>                              | P J J J       | 4976        | C J J J, USA           | S FSC   | USNM      | 504259   |
| <i>Me oplodon</i><br><i>pe i an</i>                             | P J J J       | 23629       | C J J J, USA           | S FSC   |           |          |
| <i>Me oplodon</i><br><i>ejnege i</i>                            | S J J J       | 107244      | A J J J, USA           | S FSC   |           |          |
| <i>Monodon</i><br><i>monoce o</i>                               | N J J J       | 8293        | U J J J, G J J         | S FSC   | GINR      | GF16213  |
| <i>Neophocaena</i><br><i>phocaenoide</i>                        | I J J -P J fi | 61334       | H J J K J              | S FSC   |           |          |
| <i>O caella</i><br><i>b o i o i</i>                             | I J J J       | 7205        | M J J R J L J          | S FSC   |           |          |
| <i>O caella</i><br><i>hein ohnii</i>                            | A J J J       | 2907        | Q J J J, A J J J       | S FSC   |           |          |
| <i>Peponocephala</i><br><i>elec a</i>                           | M J J J       | 41110       | H J J J, USA           | S FSC   |           |          |
| <i>Phocoena</i><br><i>diop ica</i>                              | S J J J       | 981         | E J J L J V J, A J J J | S FSC   |           |          |
| <i>Phocoena</i><br><i>phocoena</i>                              | H J J J       | S 2000-104  | C J J J, USA           | IO      |           |          |
| <i>Phocoena</i><br><i>pinipinni</i>                             | B J J J       | 1092        | P J J J                | S FSC   |           |          |

| TABLE A.1.                         | C | J             | I  |     |    |     |        |               |
|------------------------------------|---|---------------|----|-----|----|-----|--------|---------------|
| S                                  | J | C             | ID | L   | L  | I   | O      | ID            |
| <i>Phocoenoides dalli</i>          | D | 4824          | C  | USA | S  | FSC |        |               |
| <i>Ponoplocheirus blainvilliei</i> | F | 7349          | N  | A   | S  | FSC |        |               |
| <i>Pseudocarcharias kamoharui</i>  | F | 123188        | M  | H   | S  | FSC | K      | K 2010019     |
| <i>Soalicia gannadi</i>            | G | 9837          | N  | B   | S  | FSC |        |               |
| <i>Soalicia chinensis</i>          | I | 77289         | H  | K   | S  | FSC | TJ     | HKB42         |
| <i>Senella senegalensis</i>        | P | 18473         | T  | E   | S  | FSC |        |               |
| <i>Senella senegalensis</i>        | P | 38219         | T  | E   | S  | FSC |        |               |
| <i>Senellodermis meneziesi</i>     | C | 1724          | G  | M   | S  | FSC |        |               |
| <i>Senellodermis meneziesi</i>     | C | 1726          | G  | M   | S  | FSC |        |               |
| <i>Senella coelestis</i>           | S | S 2000-22     | D  | E   | IO |     |        |               |
| <i>Senella frontalis</i>           | A | 7782          | N  | A   | S  | FSC |        |               |
| <i>Senella frontalis</i>           | A | 7784          | N  | A   | S  | FSC |        |               |
| <i>Senella longirostris</i>        | S | 16012         | T  | E   | S  | FSC |        |               |
| <i>Senella longirostris</i>        | S | 24923         | T  | E   | S  | FSC |        |               |
| <i>Senobrama edanensis</i>         | R | 18431         | T  | E   | S  | FSC |        |               |
| <i>Senobrama edanensis</i>         | R | 116871        | S  | N   | S  | FSC | PIFSC  | PIC130720.01B |
| <i>Tachybracon hephestiae</i>      | S | 4971          | C  | A   | S  | FSC | USNM   | 484878        |
| <i>Tetraneura adoniadis</i>        | I | 79924         | B  | A   | S  | FSC | K-RASI | TADU080423    |
| <i>Ziphiopsis cavirostris</i>      | C | S 2002-222    | N  | E   | IO |     |        |               |
| <i>Hippopotamini amphibi</i>       | C |               | C  |     | C  |     |        |               |
| <i>Choroplatus libani</i>          | P | HMO71/0546/50 | C  |     | SL |     |        |               |
| <i>Bombus terrestris</i>           | A | 693/05 4369   | C  |     | T  | J   |        |               |
| <i>Tagelapha egyptica</i>          | B | 20080367M10   | C  |     | SL |     |        |               |
| <i>Gasterocercus abicaria</i>      | A | 634/0821/7/08 | C  |     | T  | J   |        |               |

AAD, A<sub>1</sub>, A<sub>2</sub>, A<sub>3</sub>, A<sub>4</sub>, A<sub>5</sub>, A<sub>6</sub>, A<sub>7</sub>, A<sub>8</sub>, A<sub>9</sub>, A<sub>10</sub>, A<sub>11</sub>, A<sub>12</sub>, A<sub>13</sub>, A<sub>14</sub>, A<sub>15</sub>, A<sub>16</sub>, A<sub>17</sub>, A<sub>18</sub>, A<sub>19</sub>, A<sub>20</sub>, A<sub>21</sub>, A<sub>22</sub>, A<sub>23</sub>, A<sub>24</sub>, A<sub>25</sub>, A<sub>26</sub>, A<sub>27</sub>, A<sub>28</sub>, A<sub>29</sub>, A<sub>30</sub>, A<sub>31</sub>, A<sub>32</sub>, A<sub>33</sub>, A<sub>34</sub>, A<sub>35</sub>, A<sub>36</sub>, A<sub>37</sub>, A<sub>38</sub>, A<sub>39</sub>, A<sub>40</sub>, A<sub>41</sub>, A<sub>42</sub>, A<sub>43</sub>, A<sub>44</sub>, A<sub>45</sub>, A<sub>46</sub>, A<sub>47</sub>, A<sub>48</sub>, A<sub>49</sub>, A<sub>50</sub>, A<sub>51</sub>, A<sub>52</sub>, A<sub>53</sub>, A<sub>54</sub>, A<sub>55</sub>, A<sub>56</sub>, A<sub>57</sub>, A<sub>58</sub>, A<sub>59</sub>, A<sub>60</sub>, A<sub>61</sub>, A<sub>62</sub>, A<sub>63</sub>, A<sub>64</sub>, A<sub>65</sub>, A<sub>66</sub>, A<sub>67</sub>, A<sub>68</sub>, A<sub>69</sub>, A<sub>70</sub>, A<sub>71</sub>, A<sub>72</sub>, A<sub>73</sub>, A<sub>74</sub>, A<sub>75</sub>, A<sub>76</sub>, A<sub>77</sub>, A<sub>78</sub>, A<sub>79</sub>, A<sub>80</sub>, A<sub>81</sub>, A<sub>82</sub>, A<sub>83</sub>, A<sub>84</sub>, A<sub>85</sub>, A<sub>86</sub>, A<sub>87</sub>, A<sub>88</sub>, A<sub>89</sub>, A<sub>90</sub>, A<sub>91</sub>, A<sub>92</sub>, A<sub>93</sub>, A<sub>94</sub>, A<sub>95</sub>, A<sub>96</sub>, A<sub>97</sub>, A<sub>98</sub>, A<sub>99</sub>, A<sub>100</sub>, A<sub>101</sub>, A<sub>102</sub>, A<sub>103</sub>, A<sub>104</sub>, A<sub>105</sub>, A<sub>106</sub>, A<sub>107</sub>, A<sub>108</sub>, A<sub>109</sub>, A<sub>110</sub>, A<sub>111</sub>, A<sub>112</sub>, A<sub>113</sub>, A<sub>114</sub>, A<sub>115</sub>, A<sub>116</sub>, A<sub>117</sub>, A<sub>118</sub>, A<sub>119</sub>, A<sub>120</sub>, A<sub>121</sub>, A<sub>122</sub>, A<sub>123</sub>, A<sub>124</sub>, A<sub>125</sub>, A<sub>126</sub>, A<sub>127</sub>, A<sub>128</sub>, A<sub>129</sub>, A<sub>130</sub>, A<sub>131</sub>, A<sub>132</sub>, A<sub>133</sub>, A<sub>134</sub>, A<sub>135</sub>, A<sub>136</sub>, A<sub>137</sub>, A<sub>138</sub>, A<sub>139</sub>, A<sub>140</sub>, A<sub>141</sub>, A<sub>142</sub>, A<sub>143</sub>, A<sub>144</sub>, A<sub>145</sub>, A<sub>146</sub>, A<sub>147</sub>, A<sub>148</sub>, A<sub>149</sub>, A<sub>150</sub>, A<sub>151</sub>, A<sub>152</sub>, A<sub>153</sub>, A<sub>154</sub>, A<sub>155</sub>, A<sub>156</sub>, A<sub>157</sub>, A<sub>158</sub>, A<sub>159</sub>, A<sub>160</sub>, A<sub>161</sub>, A<sub>162</sub>, A<sub>163</sub>, A<sub>164</sub>, A<sub>165</sub>, A<sub>166</sub>, A<sub>167</sub>, A<sub>168</sub>, A<sub>169</sub>, A<sub>170</sub>, A<sub>171</sub>, A<sub>172</sub>, A<sub>173</sub>, A<sub>174</sub>, A<sub>175</sub>, A<sub>176</sub>, A<sub>177</sub>, A<sub>178</sub>, A<sub>179</sub>, A<sub>180</sub>, A<sub>181</sub>, A<sub>182</sub>, A<sub>183</sub>, A<sub>184</sub>, A<sub>185</sub>, A<sub>186</sub>, A<sub>187</sub>, A<sub>188</sub>, A<sub>189</sub>, A<sub>190</sub>, A<sub>191</sub>, A<sub>192</sub>, A<sub>193</sub>, A<sub>194</sub>, A<sub>195</sub>, A<sub>196</sub>, A<sub>197</sub>, A<sub>198</sub>, A<sub>199</sub>, A<sub>200</sub>, A<sub>201</sub>, A<sub>202</sub>, A<sub>203</sub>, A<sub>204</sub>, A<sub>205</sub>, A<sub>206</sub>, A<sub>207</sub>, A<sub>208</sub>, A<sub>209</sub>, A<sub>210</sub>, A<sub>211</sub>, A<sub>212</sub>, A<sub>213</sub>, A<sub>214</sub>, A<sub>215</sub>, A<sub>216</sub>, A<sub>217</sub>, A<sub>218</sub>, A<sub>219</sub>, A<sub>220</sub>, A<sub>221</sub>, A<sub>222</sub>, A<sub>223</sub>, A<sub>224</sub>, A<sub>225</sub>, A<sub>226</sub>, A<sub>227</sub>, A<sub>228</sub>, A<sub>229</sub>, A<sub>230</sub>, A<sub>231</sub>, A<sub>232</sub>, A<sub>233</sub>, A<sub>234</sub>, A<sub>235</sub>, A<sub>236</sub>, A<sub>237</sub>, A<sub>238</sub>, A<sub>239</sub>, A<sub>240</sub>, A<sub>241</sub>, A<sub>242</sub>, A<sub>243</sub>, A<sub>244</sub>, A<sub>245</sub>, A<sub>246</sub>, A<sub>247</sub>, A<sub>248</sub>, A<sub>249</sub>, A<sub>250</sub>, A<sub>251</sub>, A<sub>252</sub>, A<sub>253</sub>, A<sub>254</sub>, A<sub>255</sub>, A<sub>256</sub>, A<sub>257</sub>, A<sub>258</sub>, A<sub>259</sub>, A<sub>260</sub>, A<sub>261</sub>, A<sub>262</sub>, A<sub>263</sub>, A<sub>264</sub>, A<sub>265</sub>, A<sub>266</sub>, A<sub>267</sub>, A<sub>268</sub>, A<sub>269</sub>, A<sub>270</sub>, A<sub>271</sub>, A<sub>272</sub>, A<sub>273</sub>, A<sub>274</sub>, A<sub>275</sub>, A<sub>276</sub>, A<sub>277</sub>, A<sub>278</sub>, A<sub>279</sub>, A<sub>280</sub>, A<sub>281</sub>, A<sub>282</sub>, A<sub>283</sub>, A<sub>284</sub>, A<sub>285</sub>, A<sub>286</sub>, A<sub>287</sub>, A<sub>288</sub>, A<sub>289</sub>, A<sub>290</sub>, A<sub>291</sub>, A<sub>292</sub>, A<sub>293</sub>, A<sub>294</sub>, A<sub>295</sub>, A<sub>296</sub>, A<sub>297</sub>, A<sub>298</sub>, A<sub>299</sub>, A<sub>300</sub>, A<sub>301</sub>, A<sub>302</sub>, A<sub>303</sub>, A<sub>304</sub>, A<sub>305</sub>, A<sub>306</sub>, A<sub>307</sub>, A<sub>308</sub>, A<sub>309</sub>, A<sub>310</sub>, A<sub>311</sub>, A<sub>312</sub>, A<sub>313</sub>, A<sub>314</sub>, A<sub>315</sub>, A<sub>316</sub>, A<sub>317</sub>, A<sub>318</sub>, A<sub>319</sub>, A<sub>320</sub>, A<sub>321</sub>, A<sub>322</sub>, A<sub>323</sub>, A<sub>324</sub>, A<sub>325</sub>, A<sub>326</sub>, A<sub>327</sub>, A<sub>328</sub>, A<sub>329</sub>, A<sub>330</sub>, A<sub>331</sub>, A<sub>332</sub>, A<sub>333</sub>, A<sub>334</sub>, A<sub>335</sub>, A<sub>336</sub>, A<sub>337</sub>, A<sub>338</sub>, A<sub>339</sub>, A<sub>340</sub>, A<sub>341</sub>, A<sub>342</sub>, A<sub>343</sub>, A<sub>344</sub>, A<sub>345</sub>, A<sub>346</sub>, A<sub>347</sub>, A<sub>348</sub>, A<sub>349</sub>, A<sub>350</sub>, A<sub>351</sub>, A<sub>352</sub>, A<sub>353</sub>, A<sub>354</sub>, A<sub>355</sub>, A<sub>356</sub>, A<sub>357</sub>, A<sub>358</sub>, A<sub>359</sub>, A<sub>360</sub>, A<sub>361</sub>, A<sub>362</sub>, A<sub>363</sub>, A<sub>364</sub>, A<sub>365</sub>, A<sub>366</sub>, A<sub>367</sub>, A<sub>368</sub>, A<sub>369</sub>, A<sub>370</sub>, A<sub>371</sub>, A<sub>372</sub>, A<sub>373</sub>, A<sub>374</sub>, A<sub>375</sub>, A<sub>376</sub>, A<sub>377</sub>, A<sub>378</sub>, A<sub>379</sub>, A<sub>380</sub>, A<sub>381</sub>, A<sub>382</sub>, A<sub>383</sub>, A<sub>384</sub>, A<sub>385</sub>, A<sub>386</sub>, A<sub>387</sub>, A<sub>388</sub>, A<sub>389</sub>, A<sub>390</sub>, A<sub>391</sub>, A<sub>392</sub>, A<sub>393</sub>, A<sub>394</sub>, A<sub>395</sub>, A<sub>396</sub>, A<sub>397</sub>, A<sub>398</sub>, A<sub>399</sub>, A<sub>400</sub>, A<sub>401</sub>, A<sub>402</sub>, A<sub>403</sub>, A<sub>404</sub>, A<sub>405</sub>, A<sub>406</sub>, A<sub>407</sub>, A<sub>408</sub>, A<sub>409</sub>, A<sub>410</sub>, A<sub>411</sub>, A<sub>412</sub>, A<sub>413</sub>, A<sub>414</sub>, A<sub>415</sub>, A<sub>416</sub>, A<sub>417</sub>, A<sub>418</sub>, A<sub>419</sub>, A<sub>420</sub>,





- L<sup>o</sup>, M<sup>o</sup>, C<sup>o</sup>, M<sup>o</sup>, B<sup>o</sup>, G<sup>o</sup>, D<sup>o</sup>, C<sup>o</sup>, S<sup>o</sup>,  
 G<sup>o</sup>, R<sup>o</sup>, S<sup>o</sup>, É<sup>o</sup>, U<sup>o</sup>, M<sup>o</sup>, M<sup>o</sup>, C. 2017. E<sup>o</sup>,  
 C<sup>o</sup>, B<sup>o</sup>. 27:1535-1541. 2
- L<sup>o</sup>, F<sup>o</sup>, B<sup>o</sup>, M<sup>o</sup>, R<sup>o</sup>, C<sup>o</sup>, N<sup>o</sup>, M. 2019.  
 R<sup>o</sup>, M<sup>o</sup>, DNA 10:5.
- L<sup>o</sup>, R<sup>o</sup>, F<sup>o</sup>, P.B., A.M., S<sup>o</sup>, T<sup>o</sup>, C<sup>o</sup>, B. 2016.  
 P<sup>o</sup>, H<sup>o</sup>, 2: 772-773.
- M<sup>o</sup>, B<sup>o</sup>, E<sup>o</sup>, 34:772-773.
- L<sup>o</sup>, R.G., P<sup>o</sup>, F<sup>o</sup>, D<sup>o</sup>, A.E. 1999. P<sup>o</sup>,  
 M<sup>o</sup>, M<sup>o</sup>, S.J. 15:619-648.
- L<sup>o</sup>, T<sup>o</sup>, G<sup>o</sup>, M<sup>o</sup>, O<sup>o</sup>, L<sup>o</sup>, M.F., P<sup>o</sup>, B.J., S<sup>o</sup>,  
 K<sup>o</sup>, P<sup>o</sup>, É<sup>o</sup>, J<sup>o</sup>, G<sup>o</sup>, M<sup>o</sup>, É<sup>o</sup>, L.D., L<sup>o</sup>,  
 C.B., H<sup>o</sup>, A.K., C<sup>o</sup>, M<sup>o</sup>, G<sup>o</sup>, S<sup>o</sup>, A<sup>o</sup>, J<sup>o</sup>, B<sup>o</sup>, K<sup>o</sup>,  
 C<sup>o</sup>, J<sup>o</sup>, C<sup>o</sup>, H<sup>o</sup>, C<sup>o</sup>, J<sup>o</sup>, D<sup>o</sup>, P<sup>o</sup>, F<sup>o</sup>, H<sup>o</sup>, S<sup>o</sup>, F<sup>o</sup>, P<sup>o</sup>,  
 G<sup>o</sup>, M<sup>o</sup>, H<sup>o</sup>, M<sup>o</sup>, J<sup>o</sup>, D.B., J<sup>o</sup>, L<sup>o</sup>, K<sup>o</sup>, J<sup>o</sup>, K<sup>o</sup>,  
 D<sup>o</sup>, L<sup>o</sup>, M<sup>o</sup>, M<sup>o</sup>, A.L., M<sup>o</sup>, T<sup>o</sup>, M<sup>o</sup>, I<sup>o</sup>, R<sup>o</sup>, B.J.,  
 R<sup>o</sup>, M.D., R<sup>o</sup>, J<sup>o</sup>, S<sup>o</sup>, A<sup>o</sup>, V<sup>o</sup>, A.J., J<sup>o</sup>,  
 M.C., K.C., K<sup>o</sup>, C.L., M<sup>o</sup>, D.M., G<sup>o</sup>, R.A.,  
 C<sup>o</sup>, M<sup>o</sup>, E.R., G.M., R.K., B<sup>o</sup>,  
 E<sup>o</sup>, M<sup>o</sup>, E.H., H<sup>o</sup>, J<sup>o</sup>, G<sup>o</sup>, E.D., H<sup>o</sup>, D<sup>o</sup>, S<sup>o</sup>, A<sup>o</sup>,  
 G<sup>o</sup>, N<sup>o</sup>, P<sup>o</sup>, K.S., P<sup>o</sup>, J.S., L<sup>o</sup>, E.S., K<sup>o</sup>, M. 2011.  
 A<sup>o</sup>, 29

- [illegible]
